# Supplementary material
Source: PubMed Central journal article supplement (PMC7675360)
Supplement: BJH-191-390-s001.pdf [file BJH-191-390-s001.pdf]

# **A left shift in oxyhaemoglobin dissociation curve in patients with severe COVID-19**

## **Supplementary information**

### **Authors**

Dominik J Vogel <sup>1</sup>

Federico Formenti <sup>2, 3</sup>

Andrew J Retter <sup>1</sup>

Francesco Vasques <sup>1</sup>

Luigi Camporota <sup>1, 2</sup>

### **Authors' Information**

**1** Intensive Care Unit, Guy's and St Thomas' NHS Foundation Trust, London

**2** Centre for Human and Applied Physiological Sciences, Faculty of Life Sciences and Medicine, King's College London, London

**3** Nuffield Division of Anaesthetics, Nuffield Department of Clinical Neurosciences, University of Oxford, Oxford

### **Corresponding author**

Dr Dominik J Vogel – dominik.vogel@gstt.nhs.uk

## Supplemental results

### Oxyhaemoglobin dissociation curve

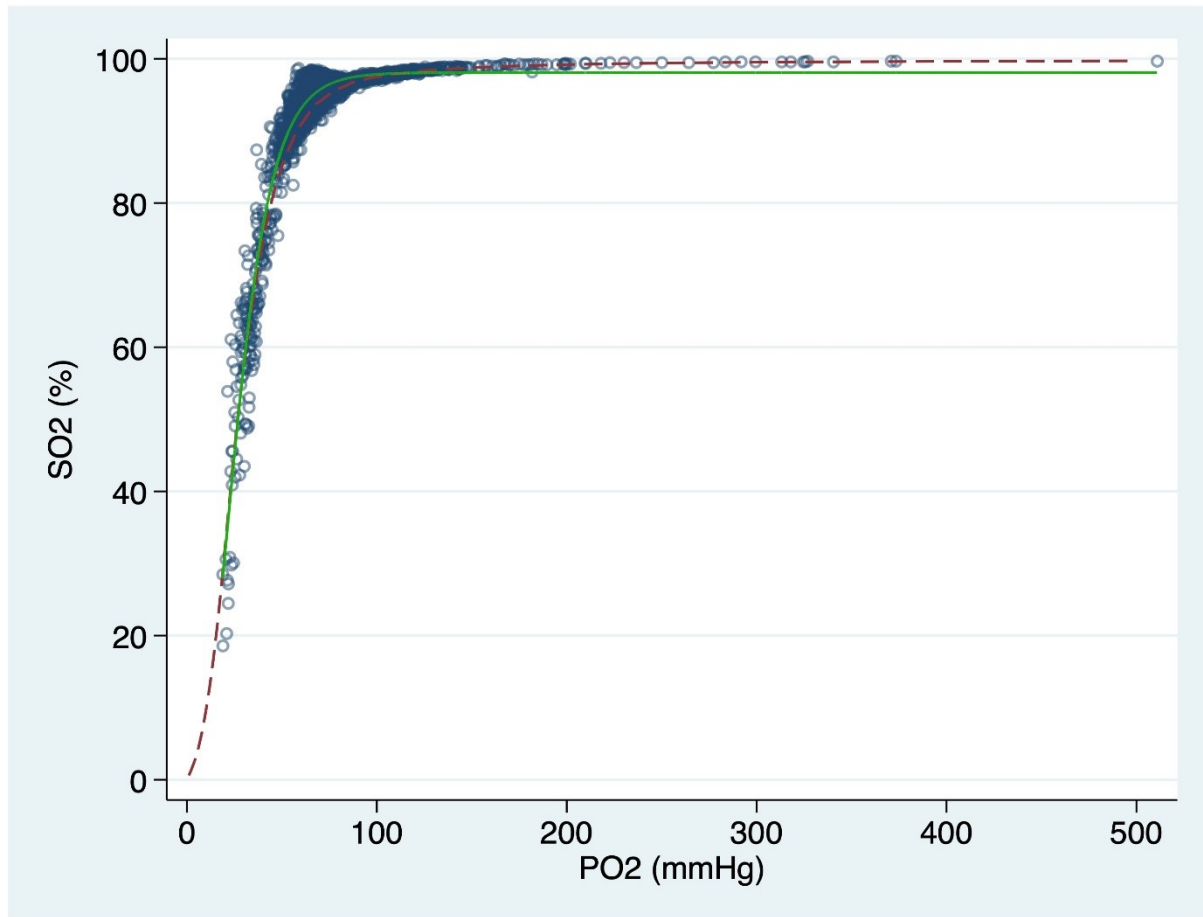

**eFigure 1.**  $\text{SO}_2$  with respective  $\text{pO}_2$  for 3,518 blood gas analyses (circles) and the sigmoid fitting line (green line). For comparison standard oxyhaemoglobin dissociation curve is shown (dashed red line). (1)

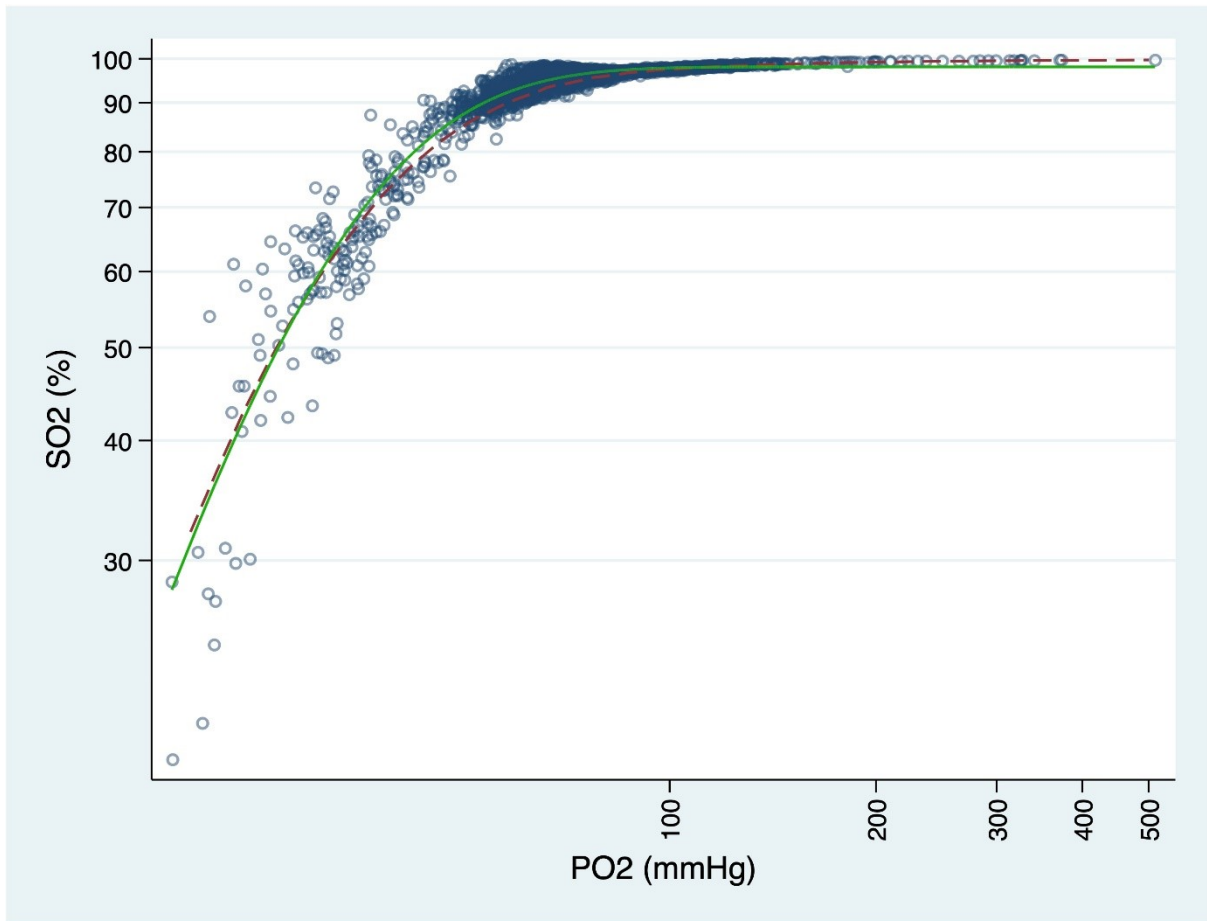

**eFigure 2.** Hill plot showing SO<sub>2</sub> with respective pO<sub>2</sub> for 3,518 blood gas analyses (circles) and the sigmoid fitting line (green line). For comparison standard oxyhaemoglobin dissociation curve is shown (dashed red line). (1)

Inter subject variability

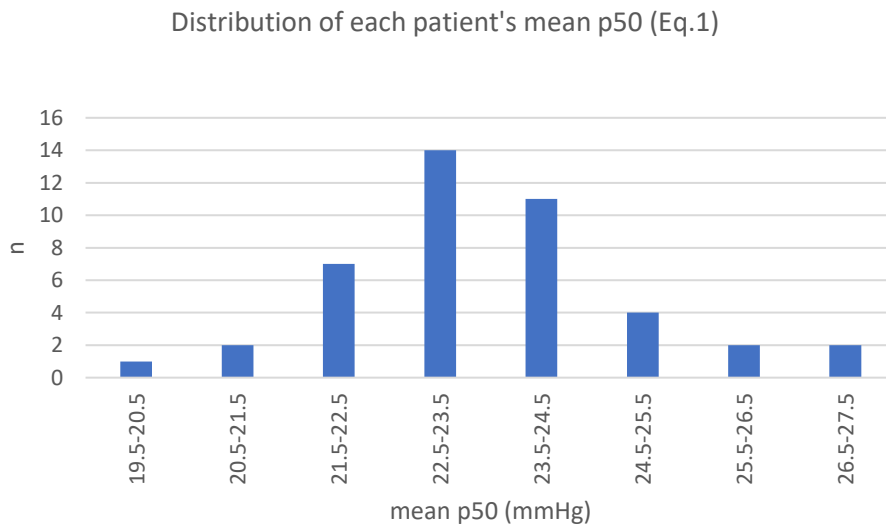

**eFigure 2** Distribution of the mean  $p_{50}$  calculated for each subject according to the following equation (see Eq. 1 in the main text):  $p_{50} = pO_{2(corr)} \times \left(\frac{1-SO_2}{SO_2}\right)^{\frac{1}{2.711}}$ ,

$$\text{where } pO_{2(corr)} = pO_2 \times 10^{[0.48(pH-7.4)-0.024(T-37)-0.0013 \times \text{Base Excess}]}$$

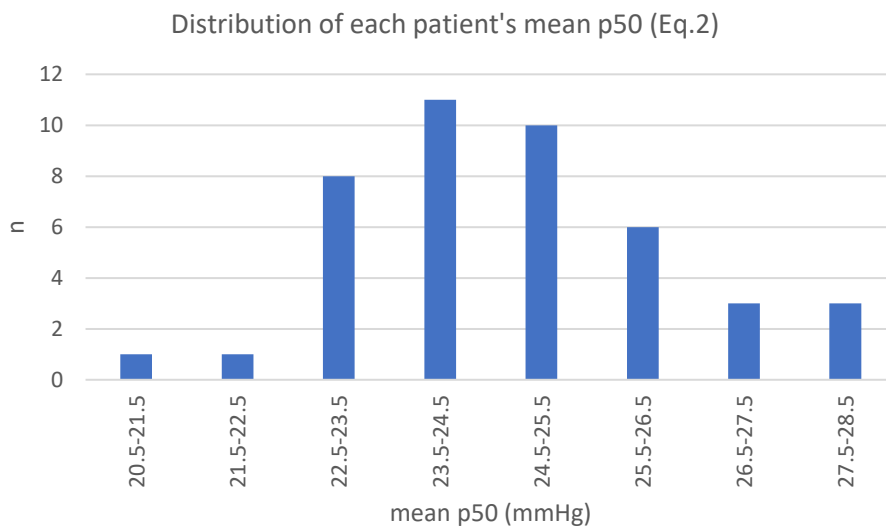

**eFigure 3** Distribution of the mean  $p_{50}$  calculated for each subject according to the following equation (see Eq. 2 in the main text):  $p_{50} = 26.7 \times 10^{(lg pO_2 - lg pO_2^k)}$ ,

$$\text{where } lg pO_2^k = \frac{lg Q + 4.172}{2.9} \text{ and } Q = \frac{SO_2}{100\% - SO_2} .$$

### Individual's mean p50

The mean (SD) of each individual's mean p<sub>50</sub> for Eq.1 was 23.46 mmHg (1.39) and Eq. 2 was 24.74 mmHg (1.58). Thus, the left shift is still present when only using one value per patient (n=43). Comparing this to normal p<sub>50</sub> (26.7 mmHg) with one sample t test showed a statistically significant difference (p<0.0001 with df=42 respectively; t = 15.2850 for Eq.1 and t = 9.673 for Eq.2)

### Intra subject variability

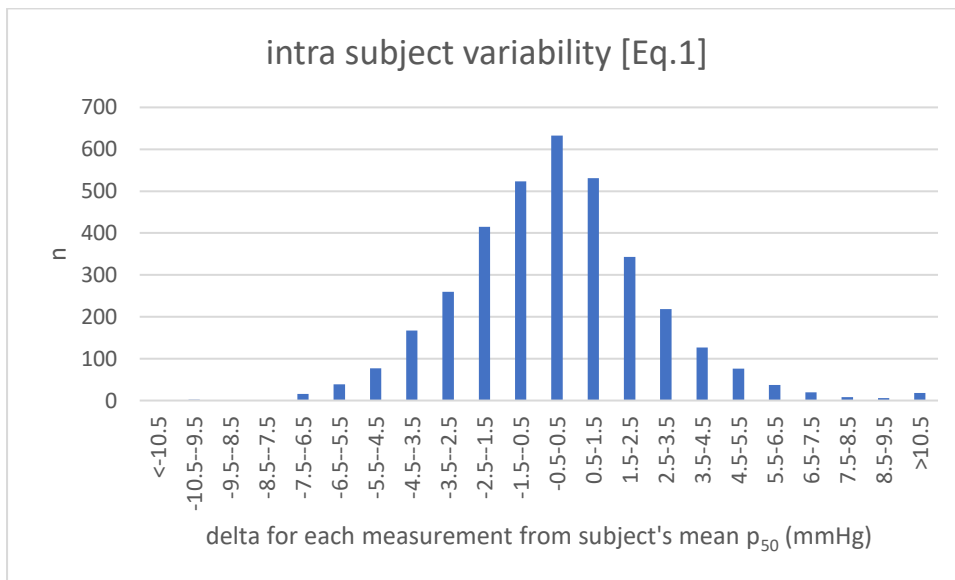

**eFigure 4** Distribution of absolute difference between each measurement and the respective individual's mean p<sub>50</sub> calculated with the Eq.1.

## Time

Patients spent a mean of 11.5 days in ICU during the observation period. Each individual's  $p_{50}$  varied during their time in ICU. However, plotting each measurement's deviation from the individual's mean  $p_{50}$  against elapsed time from first measurement did not show a relevant unidirectional change (eFig. 5).

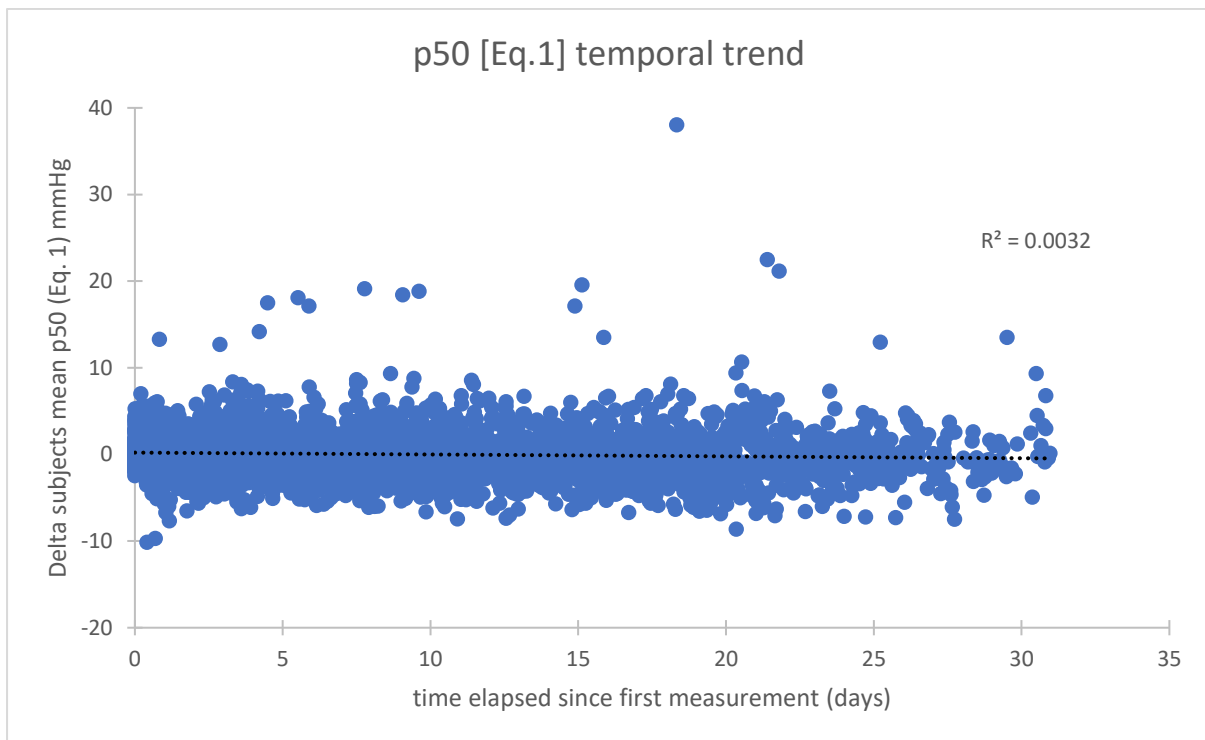

**eFigure 5** Delta between each individual measurement from the mean  $p_{50}$  of that subject plotted over time starting from the first measurement.

Furthermore, individuals who spent a longer period in ICU during the observation period, did not show a different mean  $p_{50}$  and there was no specific correlation between mean  $p_{50}$  and time spent in ICU during the observation period (eFig. 6).

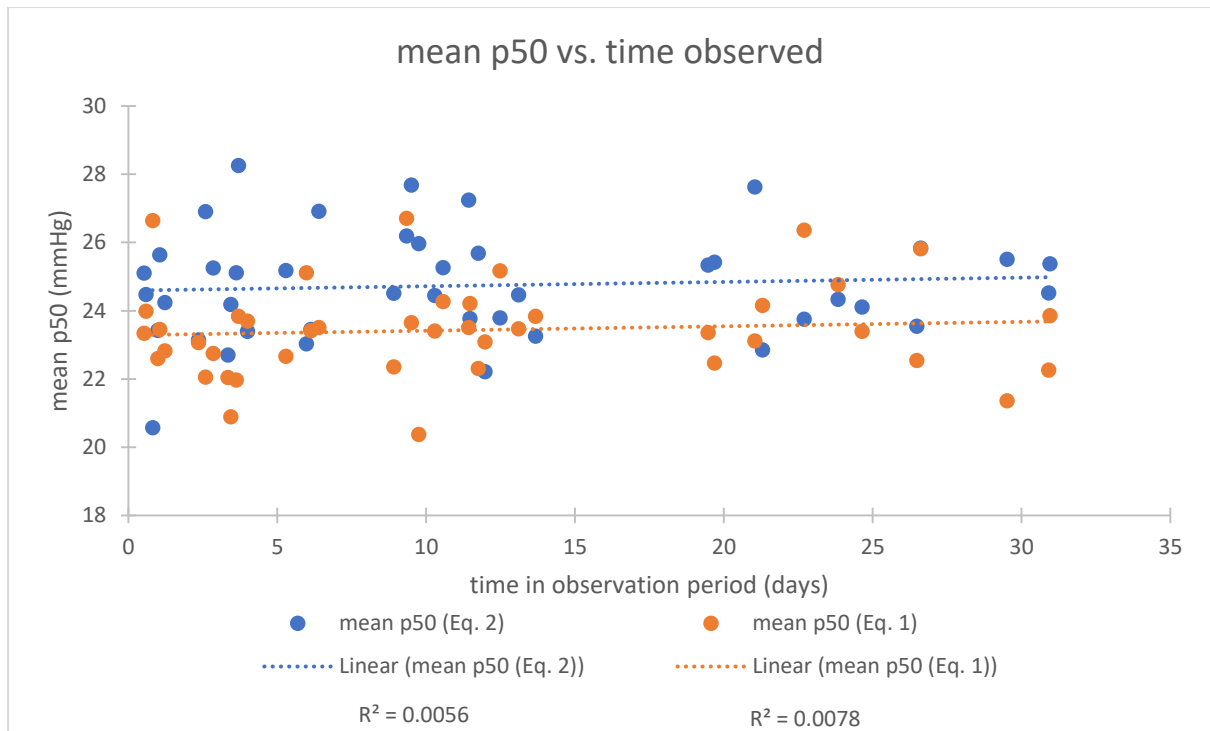

**eFigure 6** Distribution of the individual patients' mean p50 calculated with Eq.1 and Eq.2 plotted according to their length of stay during the observation period.

1. Severinghaus JW. Simple, accurate equations for human blood O2 dissociation computations. *J Appl Physiol Respir Environ Exerc Physiol.* 1979;46(3):599-602.
